1           **Gene editing in the nematode parasite *Nippostrongylus brasiliensis* using**  
2           **extracellular vesicles to deliver active Cas9/guide RNA complexes**

3

4

5

6   Jana Hagen<sup>1</sup>, Subhanita Ghosh<sup>2</sup>, Peter Sarkies<sup>3</sup> and Murray E. Selkirk<sup>1</sup>

7

8   <sup>1</sup>Department of Life Sciences, Imperial College London, London SW7 2AZ, UK

9   <sup>2</sup>MRC London Institute of Medical Sciences, Imperial College London, Du Cane Rd,

10   London W12 0NN, UK

11   <sup>3</sup>Department of Biochemistry, University of Oxford, South Parks Road, Oxford, OX13QU

12

13   **\*Corresponding author**

14   M.E. Selkirk

15   Department of Life Sciences

16   Imperial College London

17   London UK

18   Tel: +44 (0)20 7594 5214

19   Email: [m.selkirk@imperial.ac.uk](mailto:m.selkirk@imperial.ac.uk)

20   **Short title:** CRISPR/Cas9-mediated gene editing in a parasitic nematode

21

## 22 **Abstract**

23 Despite recent advances, animal-parasitic nematodes have thus far been largely refractory to  
24 genetic manipulation. We describe here a new approach providing proof of principle that  
25 CRISPR/Cas9-mediated gene editing of parasitic nematodes is achievable using vesicular  
26 stomatitis virus glycoprotein-pseudotyped extracellular vesicles (EV) for the delivery of Cas9-  
27 synthetic guide RNA (RNP) complexes. We demonstrate that EV-delivered RNPs can be used  
28 to disrupt a secreted DNase II in *Nippostrongylus brasiliensis*. Introduction of a repair template  
29 encoding multiple stop codons led to measurable reduction in expression of the targeted gene.  
30 Altered transcripts corresponding to the edited locus were detected by RT-PCR,  
31 demonstrating that vesicles can access cells of tissues actively expressing the gene of  
32 interest. These data provide evidence that this technique can be employed for targeted gene  
33 editing in *N. brasiliensis*, making this species genetically tractable for the first time and  
34 providing a new platform for genetic analysis of parasitic nematodes.

35

## 36 **Author Summary**

37 Parasitic nematodes have a complex life cycle involving passage through a host organism,  
38 which makes them very difficult to manipulate genetically. Recently, a method for deleting,  
39 changing or replacing genes (gene editing) has been developed in other organisms which has  
40 revolutionised our ability to understand fine details of how these organisms work. It has  
41 generally not been possible to adapt this method to parasitic nematodes because delivery of  
42 the components is difficult, and this has proved to be a bottleneck in understanding how  
43 parasites develop, survive and interact with their host. We show here that the components for  
44 gene editing can be introduced into a widely used laboratory model of intestinal nematode  
45 infection by encapsulation in membrane-bound vesicles which have been modified to carry a  
46 protein which facilitates fusion of the vesicles with parasite cells and delivery of the contents.  
47 This resulted in accurate editing of a specific gene by deletion and repair, such that the amount  
48 of functional protein produced from that gene was reduced. This system should be applicable

49 to all nematode species, and will facilitate understanding of their complex biology, in addition

50 to defining new targets for control of infection.

51

## 52 **Introduction**

53 Over a quarter of the world's population are estimated to be infected with soil-transmitted  
54 helminths, representing a severe burden of disease and disability [1]. Additionally,  
55 gastrointestinal nematodes are responsible for major economic losses to the livestock  
56 industry, with rising multi-drug resistance to the major classes of anthelmintics [2]. A major  
57 bottleneck to identifying molecules that might serve as new drug targets or vaccine candidates  
58 is the genetic intractability of most parasitic nematodes, which limits screening proteins for  
59 biological properties and essential functions.

60 The delivery of foreign DNA or RNA has been identified as a limiting factor for gene  
61 silencing and transgenesis in parasitic nematodes [3,4]. Recently, we showed that  
62 *Nippostrongylus brasiliensis* could be transduced with vesicular stomatitis virus glycoprotein  
63 (VSV-G)-pseudotyped lentiviral particles, with entry most likely mediated by binding of VSV-  
64 G to low-density lipoprotein receptor-related (LRP) proteins [5,6]. However, the delivered  
65 expression cassette was subjected to gene silencing during worm development, such that  
66 further optimisation of the system is required in order to achieve robust and reliable transgene  
67 expression [5].

68 Clustered Regularly Interspaced Short Palindromic Repeat (CRISPR)/Cas9 mediated gene  
69 editing is a powerful tool which facilitates permanent modifications in genomic DNA, and this  
70 has been successfully applied to a range of helminth species for the generation of gene  
71 knockout and knockin mutants [7-9]. However, delivery of expression cassettes or  
72 Cas9/synthetic guide (sg)RNA ribonucleoprotein (RNP) complexes to parasitic nematodes  
73 has proven problematic. Injection into the syncytial gonad of adult female *Strongyloides* has  
74 been successful [7], as has lipofection of *Brugia malayi* with micelles containing RNP  
75 complexes [10]. These approaches were possible because of the unique free-living phase of  
76 *Strongyloides*, and by development of a culture system for *B. malayi*, which facilitated genetic  
77 manipulation of parasites and selection of mutants [11].

78 Recently, a new approach was established for transient delivery of RNP complexes into  
79 mammalian cells using VSV-G-pseudotyped extracellular vesicles, named NanoMEDIC  
80 (nanomembrane-derived extracellular vesicles for the delivery of macromolecular cargo) [12].  
81 Proof of principle was demonstrated in several cell types which had proven difficult to transfect  
82 such as induced pluripotent stem cells, neurons and myoblasts [12]. We thought that this could  
83 be a useful tool to apply to helminths, as lengthy optimisation of the viral delivery system for  
84 individual parasite species would be circumvented by production and assembly of RNP  
85 complexes in mammalian cells for which optimised expression cassettes and transfection  
86 protocols are readily available. Following the success of VSV-G-mediated uptake of lentiviral  
87 particles, we investigated whether NanoMEDIC could be utilised in *N. brasiliensis* as a model  
88 gastrointestinal nematode.

89

## 90 **Results**

### 91 **Characterisation of *dnase2* expression in different life stages**

92 To assess susceptibility of CRISPR-mediated gene editing in *N. brasiliensis*, we chose  
93 secreted DNase II as a target gene [13], as endonuclease activity in secreted products  
94 provides a means for functional analysis of gene expression. While the DNase II has been  
95 described to be secreted from infective larvae [14], a profile of expression in different stages  
96 has not been determined. Because a shift in temperature to 37°C acts as a cue for  
97 exsheathment and initiation of feeding in infective larvae (L3) [15], we first analysed levels of  
98 DNase II transcripts and secretion of active enzyme in L3 prior to and during activation by  
99 culture at 37°C in the presence of rat serum. Incubation at the elevated temperature led to a  
100 sharp increase in DNase II transcripts, peaking at an approximate 1000-fold increase after 2-  
101 3 days (Fig 1A). Transcript levels were drastically reduced in adult worms compared with  
102 activated L3, but remained approximately 5-fold above those in non-activated L3 (Fig 1A).  
103 Western blot analysis of parasite secreted products confirmed that the DNase II was released  
104 predominantly by activated L3 (Fig 1B). Given the detection of low levels of DNase II

105 transcripts in non-activated L3, there was a possibility that the protein might be pre-  
106 synthesised and stored in secretory vesicles allowing for immediate release upon entering the  
107 host. To assess this, we exposed non-activated and activated L3 to plasmid DNA during  
108 culture at 37°C. However, non-activated L3 did not secrete sufficient amounts of DNase II for  
109 effective degradation of DNA within the first 2 hours of incubation at 37°C, although complete  
110 degradation was achieved following overnight incubation (Fig 1C). In contrast, degradation of  
111 DNA in the culture supernatant was observed immediately following exposure to previously  
112 activated L3.  
113

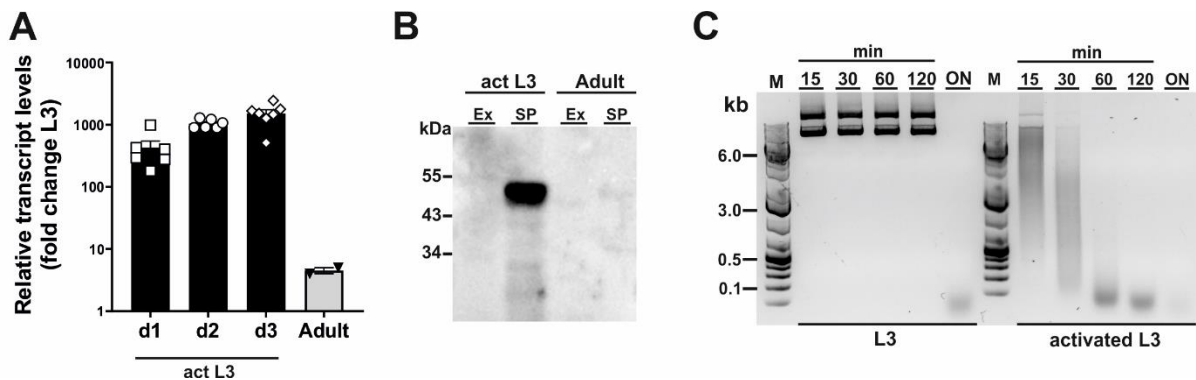

114

115 **Fig 1. *Dnase2* expression in *Nippostrongylus brasiliensis*.** (A) *Dnase2* transcripts are  
116 upregulated in L3 following activation at 37°C. Freshly isolated L3 were washed extensively,  
117 incubated at 37°C, and collected after 1 to 3 days of in vitro culture. Adult worms were  
118 recovered from the intestine of rats at day 8 post-infection. Activated L3 and adult worms were  
119 analysed by RT-qPCR for *dnase2* transcript levels relative to that of unactivated L3. (B) DNase  
120 II is predominantly secreted by activated L3. Adult worms or activated L3 were incubated for  
121 7 days or 14 days respectively in serum-free medium, culture supernatants collected and  
122 concentrated. Subsequently, 5 ug of secreted products (SP) or worm extract (Ex) were  
123 analysed for the presence of DNase II by western blot. (C) Non-activated L3 do not readily  
124 secrete DNase II. Freshly isolated or activated L3 (200 worms) were incubated in 100 µl of  
125 serum-free medium containing 2 µg of plasmid DNA for 15 min to 18 hours (overnight, ON) at  
126 37°C. Supernatants were collected at various time points and assessed for plasmid DNA  
127 degradation by resolution of DNA fragments on 1% agarose gels.

128

### 129 **Generation of extracellular vesicles containing DNase II-ribonucleoprotein complexes** 130 **or a single stranded oligodeoxynucleotide**

131 The genomic DNA sequence of DNase II was identified in NBR\_scaffold\_0001590 following  
132 alignment of the published cDNA sequence (GenBank: M938457) [13] to the genomic *N.*

133 *brasiliensis* database PRJEB511 available on WormBase ParaSite. Nine exons were defined  
134 with the two HxK motifs characteristic of DNase II and which together form a single active site  
135 [16] encoded in exons 3 and 7 (Fig 2A). Notably, while the corresponding amino acid sequence  
136 derived from NBR\_scaffold\_0001590 and M938457 was mainly conserved, some differences  
137 were detected in the cDNA sequences which could affect the prediction of effective sgRNAs  
138 (Suppl 1). Expression of NB\_Dnase2\_1590 was confirmed in our laboratory strain of *N.*  
139 *brasiliensis* following cloning of the cDNA sequence into a yeast expression vector and  
140 subsequent sequencing such that sgRNA design was based on NB\_Dnase2\_1590.

141 For transient delivery of Cas9/gRNA complexes, we adapted a recently developed  
142 NanoMEDIC approach established in mammalian cells using VSV-G-pseudotyped  
143 extracellular vesicles [12]. To predict sgRNA target sequences, the Cas-Designer (RGEN)  
144 algorithm was used, which allows for off-target screening against the *N. brasiliensis* genome  
145 [17,18]. We chose exon 3 as a target region as it encodes one of the two HxK motifs of  
146 functional DNases [16] (Fig 2A). While some gRNAs were predicted that covered the HxK  
147 region, these did not achieve a frameshift prediction score over 66. The two highest scoring  
148 gRNAs, guide 46 and 91, flanking the HxK motif in exon 3, were cloned between the self-  
149 cleaving Hammerhead (HH) and hepatitis delta virus (HDV) ribozymes of the transfer plasmid  
150 (ribozyme-guide-ribozyme, RGR) (Fig 2B). If the deletion was insufficient or frameshift not  
151 achievable using either guide, then the EV approach would allow for multiplexing to include  
152 both guide RNAs deleting the entire motif coding sequence. Corresponding VSV-G-  
153 pseudotyped EVs containing RNP complexes (NanoMEDIC) were produced in HEK293T cells  
154 following transfection with the RGR and four packaging plasmids encoding Cas9, Gag, VSV-  
155 G and Tat (Fig 2C) [12].

156 Long terminal repeat (LTR)-driven transcription of the RGR transfer plasmid produces a  
157 virus-like mRNA encoding the gRNA and containing a packaging signal sequence ( $\Psi$ , Fig 2B).

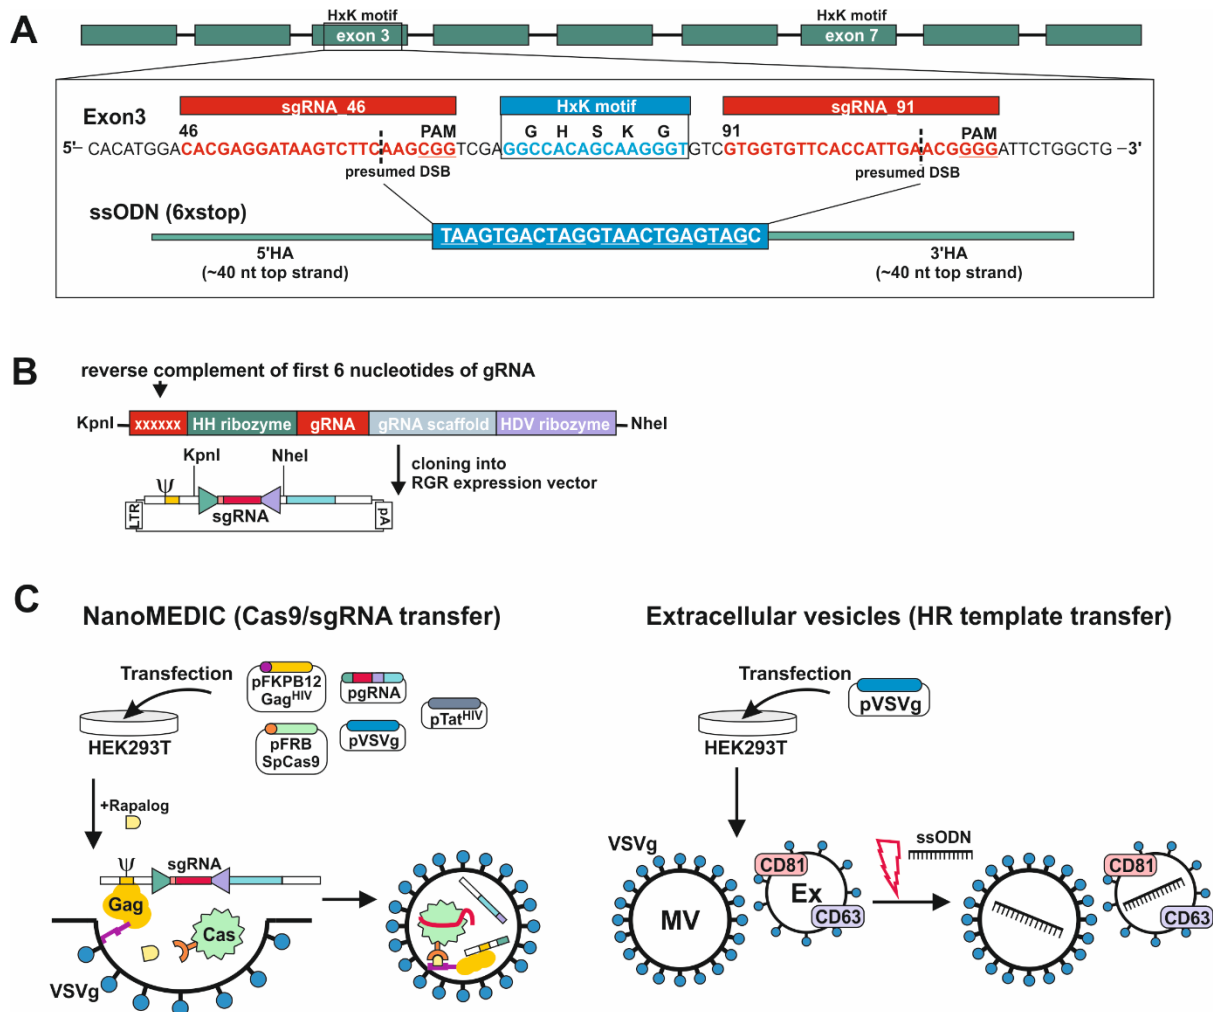

158

159

160

161

162

163

164

165

166

167

168

169

170

171

172

173

174

175

176

177

178

179

**Fig 2. Generation of extracellular vesicles carrying ribonucleoprotein complexes or a homology directed repair template.** (A) Gene model of *dnase2* (NBR\_1590) showing the position of its nine exons, eight introns and the location of the two HxK motifs. Inset of exon three: nucleotide sequence of the (+) strand indicating location and sequence of gRNA target sites (red), protospacer adjacent motifs (PAM, underlined), the presumed double-stranded breaks (DSB) (dashed line), and the 119-nucleotide sequence of the single-stranded DNA donor template provided for DSB repair by homologous recombination. Homology arms of 45 or 50 nt flank the central 24 nt of a six-stop-codon transgene. (B) Small guide (sg)RNA sequences were cloned between the self-cleaving Hammerhead (HH) and hepatitis delta virus (HDV) ribozymes of the transfer plasmid (ribozyme-guide-ribozyme, RGR) encoding a virus-like mRNA with a packaging signal sequence ( $\Psi$ ). (C) VSV-G-pseudotyped EVs containing Cas9/gRNA complexes (NanoMEDIC) were produced in HEK293T cells following transfection. The modification of Gag with FKB12 (FK506 binding protein) ensures effective packing of Gag/mRNA complexes following binding to the cell membrane. Addition of a rapalog (rapamycin analogue) ligand mediates heterodimerisation of FRB (rapamycin-binding domain)-modified Cas9 with FKB12-Gag. The sgRNA encoded in virus-like mRNA is liberated in NanoMEDIC following cleavage by two self-cleaving ribozymes and incorporated into Cas9. (D) For the HDR template transfer, EVs were produced by VSV-G-expressing HEK293T cells. Evs consisting of microvesicles (MV) and exosomes (Ex) were then loaded with HDR templates by electroporation.



180 Modification of Gag with the FK506 binding protein FKB12 ensures effective packing of  
181 Gag/mRNA complexes following binding to the cell membrane. Addition of the rapalog  
182 (rapamycin analogue) ligand A/C during EV production mediates heterodimerisation of FRB  
183 (rapamycin-binding domain)-modified Cas9 with FKB12-Gag. The sgRNA encoded in virus-  
184 like mRNA is liberated in NanoMEDIC by self-cleavage of the flanking ribozymes and  
185 incorporated into *Streptococcus pyogenes* (Sp)Cas9. Dissociation of the complexes occurs  
186 after dilution of the A/C heterodimerizer once the EVs fuse with recipient cell membranes.

187 To test whether homology directed repair could be achieved following induction of double  
188 strand breaks, we generated a single-strand oligonucleotide (ssODN) template encoding a  
189 series of 6 stop codons interspaced by single nucleotides to allow for all possible open reading  
190 frames and ~50 nt homology arms (Fig 2A), as previously described [19]. The introduction of  
191 premature stop codons allows for degradation of modified transcripts by nonsense-mediated  
192 decay and/or premature termination of translation [20]. Overexpression of VSV-G in HEK293T  
193 cells leads to an increased production of VSV-G-expressing EVs, termed 'gesicles', that can  
194 be utilised for transfer of membrane, cytoplasmic and nuclear proteins [21]. We therefore  
195 loaded VSV-G-pseudotyped EVs with the ssODN template and tested whether it could be  
196 transferred to *N. brasiliensis* L3 (Fig 2D) [22,23].

197

### 198 **NanoMEDIC in conjunction with an extracellular vesicle-delivered homology directed** 199 **repair template induces site directed mutagenesis in *Nippostrongylus* L3**

200 In a first series of experiments, activated L3 were exposed to NanoMEDIC containing sgRNAs  
201 binding at nucleotide 46 and/or 91 of exon 3 in the presence or absence of EVs containing the  
202 STOP\_ssODN for homology directed repair (HDR). Parasite genomic DNA was then  
203 assessed by PCR for modifications introduced by HDR (Fig 3A and B). PCR with primers  
204 binding the stop codon region and adjacent exon 2 or 4 led to amplification of expected PCR  
205 products (Fig 3C), indicating that NanoMEDIC in conjunction with EV-delivered ssODN  
206 templates could be used for site directed mutagenesis in *N. brasiliensis*. Furthermore, the  
207 presence of modified *dnase2* transcripts was confirmed by RT-PCR with an exon 2-specific

208 forward primer and a reverse primer binding the 6xSTOP region, resulting in a product of  
 209 approximately 140 bp (Fig 3D). PCR from genomic DNA with the same primer pair produced  
 210 an amplicon of approximately 200 bp (Fig 3C). Importantly, the presence of modified cDNA  
 211 provided evidence that NanoMEDIC and EV-delivered ssODN can reach tissues actively  
 212 expressing DNase II following ingestion.  
 213

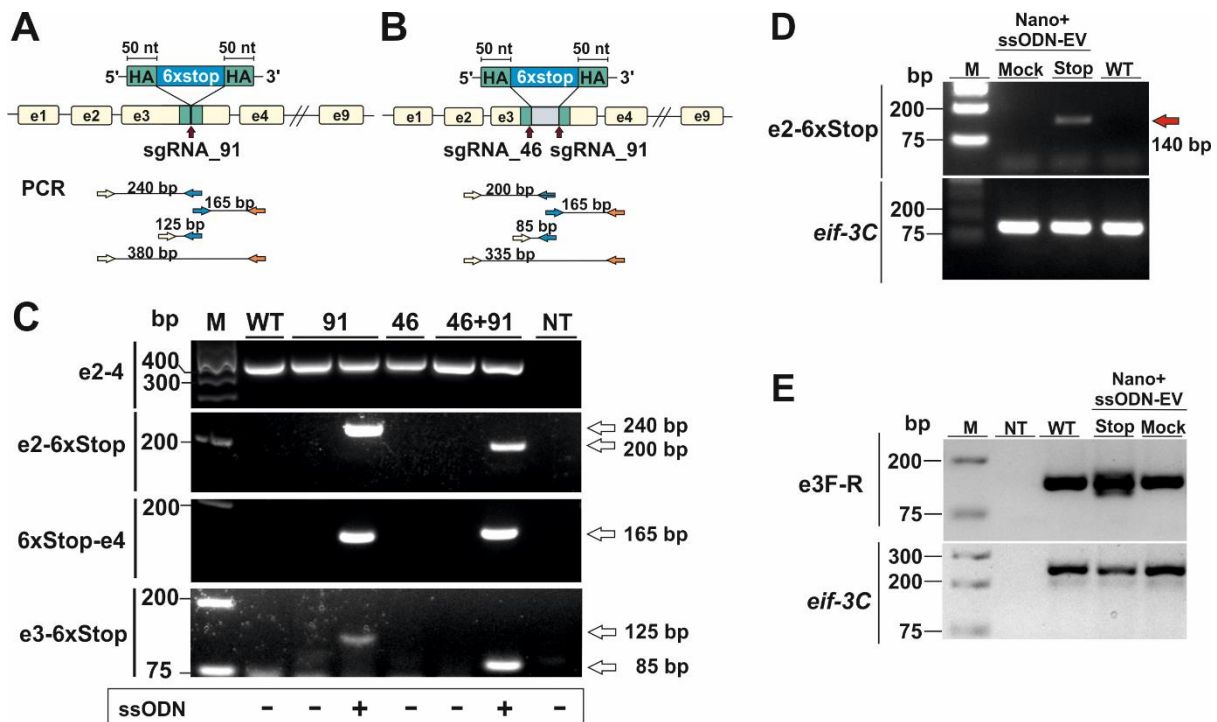

214

215 **Fig 3. CRISPR/Cas9-mediated gene editing in *N. brasiliensis* infective larvae following**  
 216 **delivery of Cas9/sgRNA complexes and homology directed repair templates via**  
 217 **extracellular vesicles.** (A,B) Knock-in of a homology directed repair (HDR) template  
 218 expression cassette. HDR utilising a single stranded oligodeoxynucleotide (ssODN) with ~50  
 219 nt homology arms introduced a series of 6 stop codons following a single (B, sgRNA91) or  
 220 double (C, sgRNA46 and 91) double stranded DNA break. (E) Detection of HDR sequences.  
 221 PCR analysis of genomic DNA following exposure of activated L3 to NanoMEDIC with or  
 222 without the addition of HDR-containing EVs. Primer pairs were designed to amplify fragments  
 223 from the adjacent exon (2 or 4) and the HDR region (6xstop) and the respective amplicon  
 224 sizes are indicated (A and B). Amplification of *eif-3c* (eukaryotic translation initiation factor 3  
 225 subunit C) was performed to control for gDNA integrity. WT, wildtype; NT, no template control.  
 226 (D) Detection of modified *dnase2* transcript. Worms were exposed to EVs as above and  
 227 modified *dnase2* transcripts confirmed by RT-PCR with an exon2-specific forward and HDR-  
 228 specific reverse primer, resulting in a ~140 bp product. The same primer pair produces a 200  
 229 bp product from genomic DNA. (E) PCR of exon 3 with primers flanking the HDR integration  
 230 site is indicative of insertions and deletions. Mock-Evs were electroporated with a single-strand  
 231 oligonucleotide encoding an irrelevant sequence of the same length as the HDR template. *Eif-*  
 232 *3C* was amplified to control for genomic DNA integrity. WT, wildtype; NT, no template control.

233 **Non-homologous end joining does not lead to effective mutations in L3**

234 In previous studies with *Strongyloides stercoralis*, non-homologous end joining (NHEJ) of  
235 CRISPR/Cas9-induced double-strand breaks following microinjection of RNP complexes into  
236 the gonad resulted in large deletions, while smaller insertions or deletions (indels) appeared  
237 to be absent. Similarly, PCR of genomic DNA carried out with an exon 2-binding forward and  
238 an exon 4-binding reverse primer resulted in a single fragment of ~350 bp in all samples  
239 tested, which could not resolve possible indels (Fig 3C). To compensate for the possibility that  
240 deletions were insufficient, or frameshift not achievable using either guide, further experiments  
241 were carried out using a combination of both guide RNAs, with or without the addition of a  
242 ssODN allowing for deletion of the entire motif. To facilitate detection of smaller changes, a  
243 further PCR was carried out with primers flanking the double stranded break sites of exon 3  
244 (Fig 3E). While multiple PCR fragments were generated in the NanoMEDIC +  
245 6xSTOP\_ssODN sample indicating integration of the HDR template, PCR with exon 3-binding  
246 forward and reverse primers still failed to resolve possible indels in worms exposed to  
247 NanoMEDIC (Fig 3E).

248 To examine potential low frequency errors induced by CRISPR/Cas9-mediated editing, we  
249 performed deep sequencing of PCR products derived from worms transfected with  
250 CRISPR/Cas9 either with or without the repair template. In worms transfected with  
251 CRISPR/Cas9 alone, after removing potential sequencing errors and PCR artefacts (see  
252 methods) single nucleotide polymorphisms (SNPs) at low frequency were detected mapping  
253 to the wild type allele of the DNase II gene, indicating that the enzyme could introduce breaks  
254 triggering error prone repair (Fig 4A). Interestingly, addition of the repair template led to an  
255 altered pattern of mutations in the wild type allele, without changing the frequency (Fig 4B).  
256 Similar patterns were seen for small indels mapping to the wild type allele (Fig 4C, D). The  
257 frequency of SNPs and indels mapping to the edited allele was low (Fig 4E,F), confirming that  
258 the homology directed repair was mostly accurate.

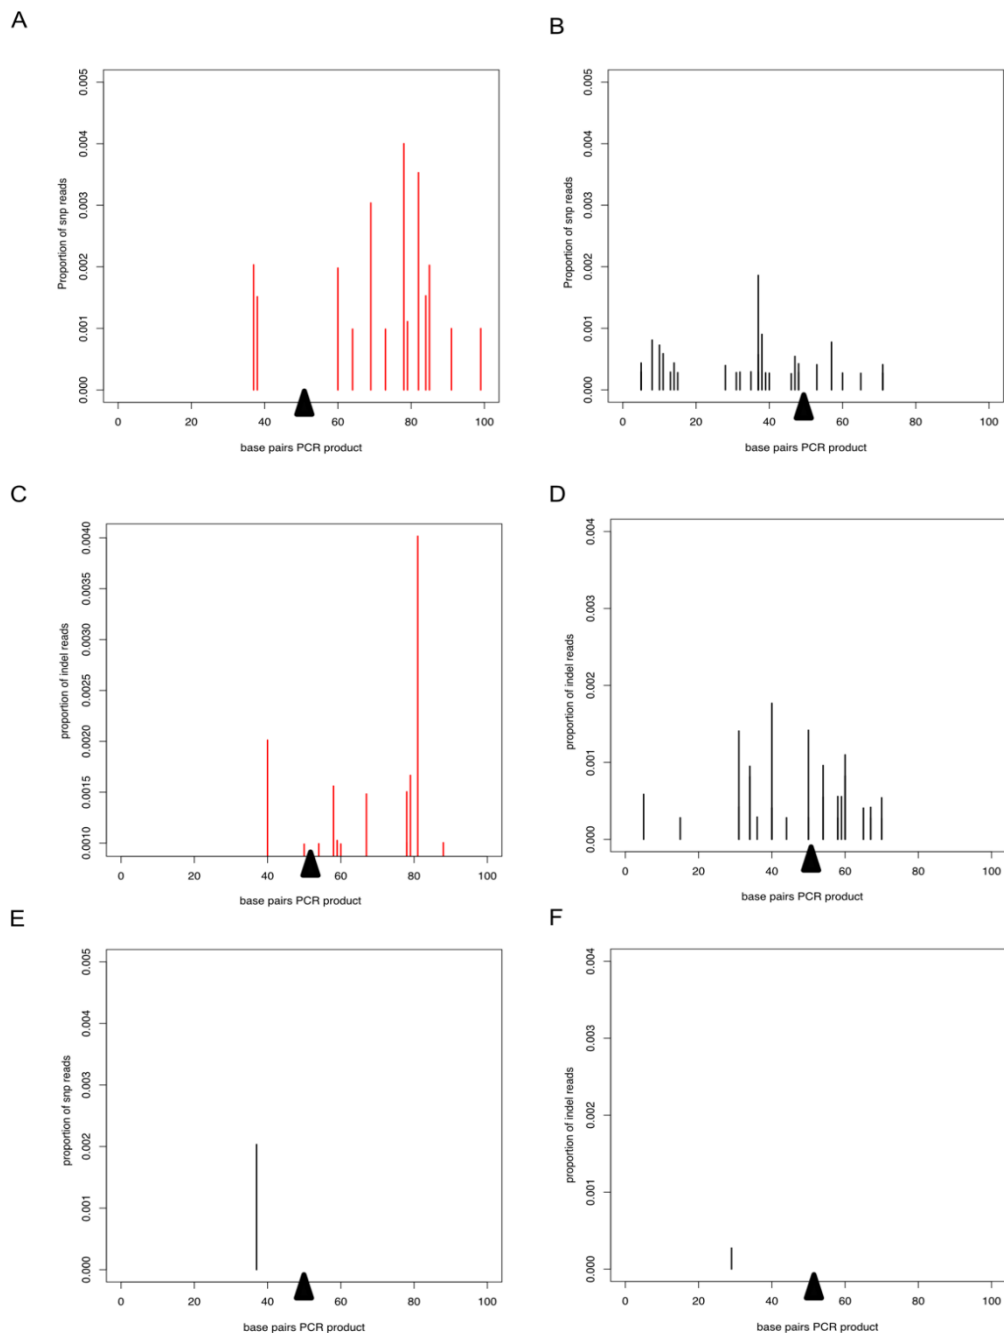

259

260 **Fig 4. Deep sequencing of PCR product from worms transfected with CRISPR/Cas9**  
261 **guide RNA complexes.** In all plots, the proportion of reads corresponding to SNPs or indels  
262 is shown on the y axis and the presumed breakpoint is indicated by a black triangle. (A) and  
263 (B) SNPs on the WT allele after transfection with the CRISPR/Cas9 guide RNA complex  
264 without (A) or with (B) the repair template. (C) and (D) Indels on the WT allele for  
265 CRISPR/Cas9 guide RNA complex without (C) or with (D) the repair template. (E) SNPs and  
266 (F) indels mapping to the repair template after transfection with the CRISPR/Cas9 guide RNA  
267 complex and the repair template.

268

269 **Diminished DNase activity in CRISPR/Cas9 mutated larvae**

270 We next assessed whether modifications introduced into the DNase II gene resulted in  
271 measurable reduction of secreted enzyme. Indeed, reduced DNase activity was observed in  
272 supernatants collected for 3 days following exposure of L3 to NanoMEDIC and ssODN (Fig  
273 5A). While complete degradation of donor DNA was observed 5 min after exposure to  
274 supernatant from control worms, this required longer (10 min) incubation with supernatant of  
275 worms exposed to NanoMEDIC and the STOP\_ssODN. Interestingly, delayed DNA  
276 degradation was only observed following delivery of the STOP\_ssODN via VSV-G-EVs  
277 (ssODN-EV), while direct electroporation of NanoMEDIC with the STOP\_ssODN  
278 (Nano+ssODN) was unsuccessful. Reduced nuclease activity was also not observed in  
279 supernatants from worms exposed to NanoMEDIC and Mock-EVs electroporated with a  
280 ssODN encoding an irrelevant sequence of the same length as the HDR template.

281 To assess the timeframe of delayed DNA degradation by modified worms, secreted  
282 products were assessed for their nuclease activity by adding a substrate plasmid DNA to the  
283 medium at the start of worm culture (Fig 5B). No intact DNA was detected after 30 min, and  
284 complete degradation recorded 60 min after culture with worms exposed to ssODN\_EVs only.  
285 In contrast, co-culture of NanoMEDIC-exposed worms revealed the presence of some intact  
286 plasmid DNA after 30 min. This was more pronounced when worms were exposed to  
287 NanoMEDIC + ssODN\_EVs, with some larger DNA fragments still present 60 min after co-  
288 culture (Fig 2B). Furthermore, RT-qPCR revealed a reduction in *dnase2* transcript levels by  
289 ~25% (mean log<sub>2</sub> ± SEM = -0.45 ± 0.12) in NanoMEDIC + ssODN\_EV samples, compared to  
290 the ssODN\_EV only group (-0.003±0.09) (Fig 5C), indicating nonsense-mediated decay of  
291 modified transcripts. Some decrease of *dnase2* transcripts (-0.17±0.09) was also recorded in  
292 the NanoMEDIC-only group, but did not reach significance (p=0.74). These data, together with  
293 PCR analysis of genomic DNA, indicate that the majority of NanoMEDIC-induced gene  
294 disruption can be repaired by non-homologous end joining, and that editing is enhanced by  
295 homology-directed repair.

296

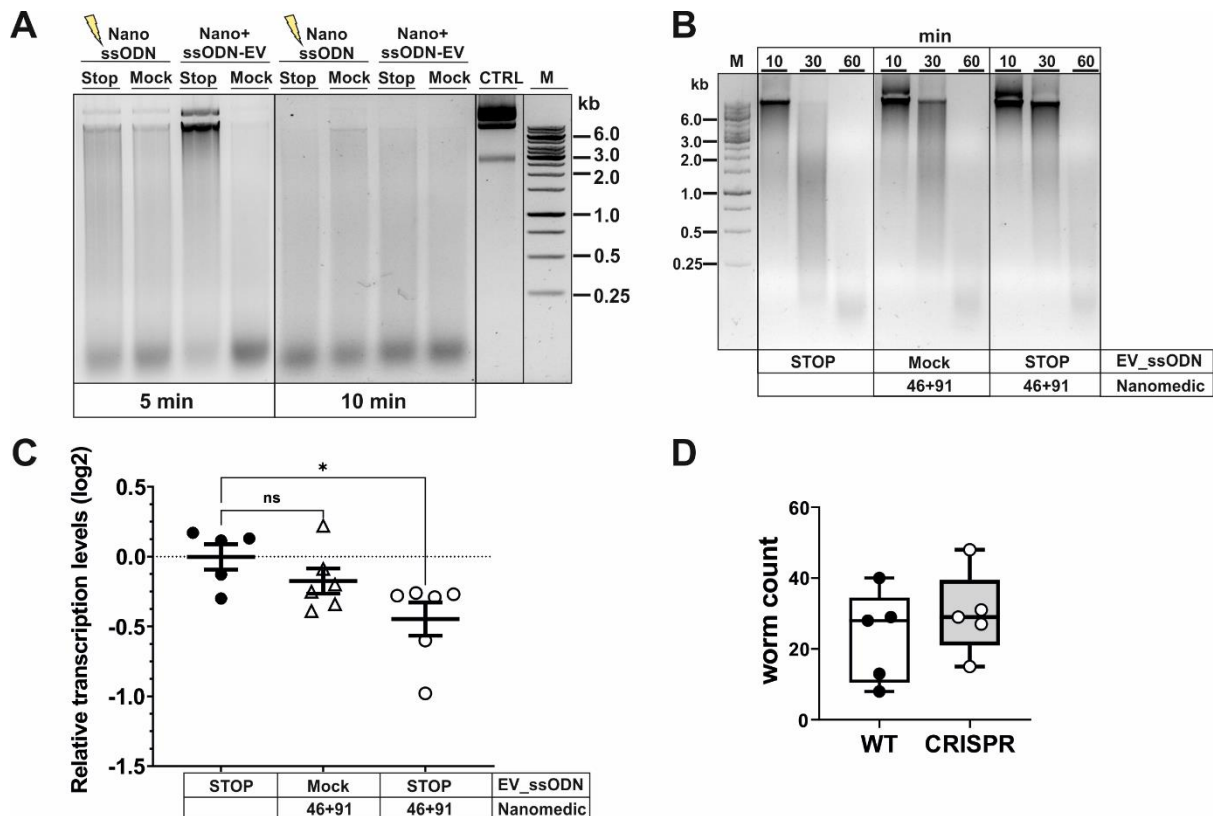

297

298

299 **Fig 5. Editing of *dnase2* results in reduced enzyme activity in larval secreted products.**

300 (A) Reduced Dnase activity in larval secreted products. Activated L3s were exposed to Evs  
 301 for 18 hours, washed and incubated for a further 48 hours. The HDR template was either  
 302 electroporated into NanoMEDIC (Nano\_ssODN) or VSV-G-pseudotyped EVs (ssODN-EV).  
 303 Mock-EVs were electroporated with a ssODN encoding an irrelevant sequence of the same  
 304 length as the HDR template. Larval secreted products were collected and assessed for DNase  
 305 activity as described in Materials and methods. Undigested plasmid DNA (CTRL) is resolved  
 306 on gels with test samples. (B) Time course of delayed DNA degradation by secreted products  
 307 from modified worms. Activated L3s were exposed to EVs for 18 hours then incubated with  
 308 plasmid DNA for 10, 30 or 60 min and supernatants analysed for DNA degradation by gel  
 309 electrophoresis. (C) Downregulation of secreted *dnase2* transcripts in activated L3s after  
 310 exposure to EVs. Transcript levels were assessed by RT-qPCR three days after transduction  
 311 relative to wild type control larvae and normalised against the geometric mean of Ct values of  
 312 reference genes *eif-3C* and *idhg-1*. Scatter plot with the mean  $\pm$  sem of data from 2  
 313 independent experiments with 3 biological replicates each consisting of  $\sim$ 2,000 larvae.  
 314 Treatment groups were analysed for significant differences with the Kruskal-Wallis test and  
 315 Dunns *post-hoc* test in relation to the wild type. Statistical significance:  $p < 0.05$ . (D) Reduction  
 316 of DNase II secretion did not lead to lower parasite recovery in mice. Activated L3 were  
 317 exposed to EVs for 18 hrs, washed and used to infect BALB/c mice. Adult worms were  
 318 recovered from the intestines at day 5 post-infection and counted.

319

320 Because *N. brasiliensis* DNase II has been demonstrated to degrade neutrophil  
 321 extracellular traps (NETs), it has been suggested to facilitate migration of L3 through the skin



322 and lung tissues of their mammalian host [13]. However, the moderate silencing of the *dnase2*  
323 gene achieved in this study did not lead to a reduction in worm numbers in the intestines of  
324 infected mice (Fig 5D). Nevertheless, these data provide proof of principle that CRISPR/Cas9-  
325 induced gene editing can be achieved in infective larvae of *N. brasiliensis* by harnessing  
326 extracellular vesicle-mediated delivery of RNPs and HDR templates, providing a new route for  
327 genetic manipulation of parasitic nematodes.

328

### 329 **Expression of a NUC-1 orthologue by *Nippostrongylus brasiliensis***

330 As reduction of secreted DNase II activity did not result in altered recovery of adult worms  
331 from infected mice, we looked for additional enzymes in case this underlied some degree of  
332 redundancy in their action. A search of WormBase ParaSite revealed that NBR\_0000088201  
333 encoded an orthologue of lysosomal DNase II from *Caenorhabditis elegans* termed NUC-1  
334 [24,25]. The derived amino acid sequence is shown in Fig 6A, aligned with that of the *N.*  
335 *brasiliensis* secreted DNase II (NBR\_00001590) [13] and *C. elegans* NUC-1, revealing 65%  
336 identity between the mature *N. brasiliensis* and *C. elegans* NUC-1 proteins. Examination of  
337 transcript levels by real-time RT-PCR (qPCR) revealed that *Nb\_nuc-1* is modestly upregulated  
338 in activated L3, consistent with emergence from a relatively quiescent state, then expressed  
339 at fairly constant levels through to adult worms (Fig 6B). Transcript levels for the secreted  
340 DNase II were 10-fold higher than *Nb\_nuc-1* in activated L3, and at least 10-fold lower than  
341 *Nb\_nuc-1* in resting L3 and adult worms (Fig 6C). This suggests that *Nb\_nuc-1* has more of a  
342 housekeeping role, consistent with a lysosomal function, and it is notable that no nuclease  
343 activity was detected in culture supernatants of L3 within the first 2 hours following activation  
344 (Fig 1C) despite appreciable levels of *Nb\_nuc-1* transcripts. In contrast, expression of the  
345 secreted DNase II was almost exclusively associated with larval activation, suggesting that  
346 this is the major or sole enzyme released into the mammalian host and primarily responsible  
347 for degradation of extracellular/environmental DNA in the early stages of infection.

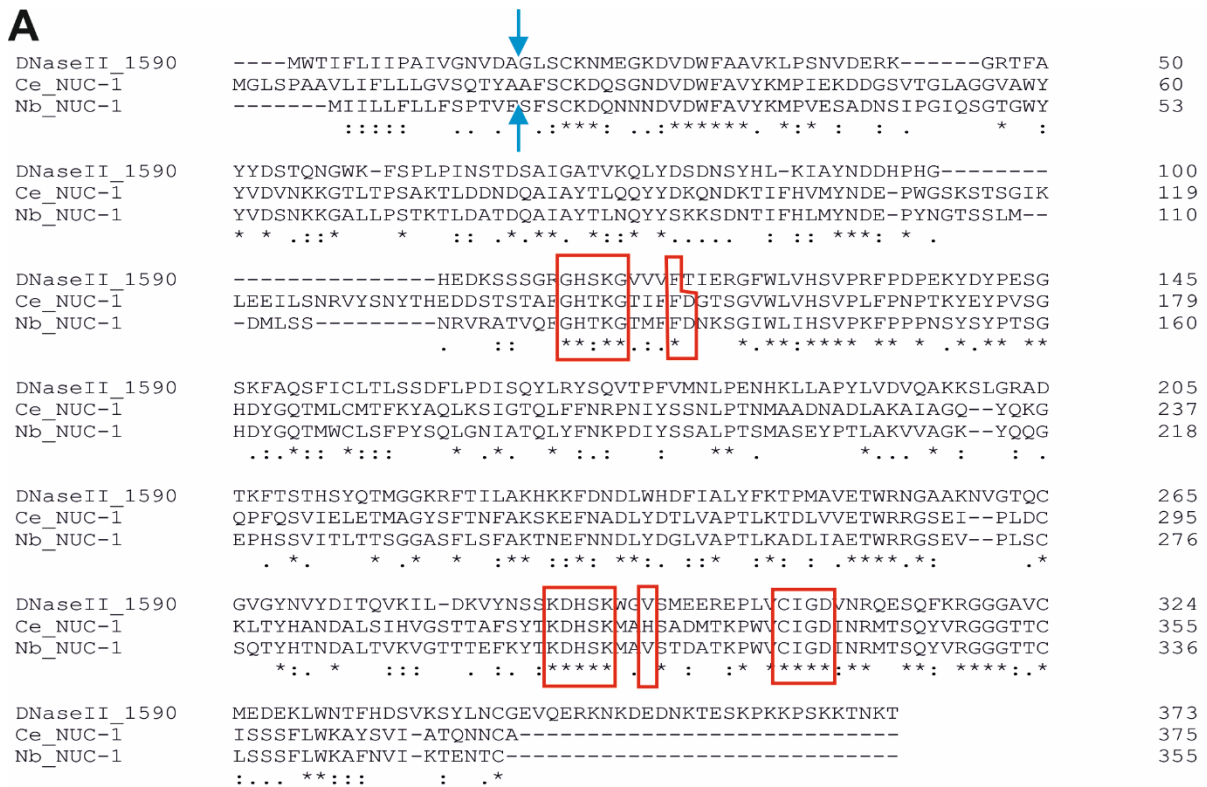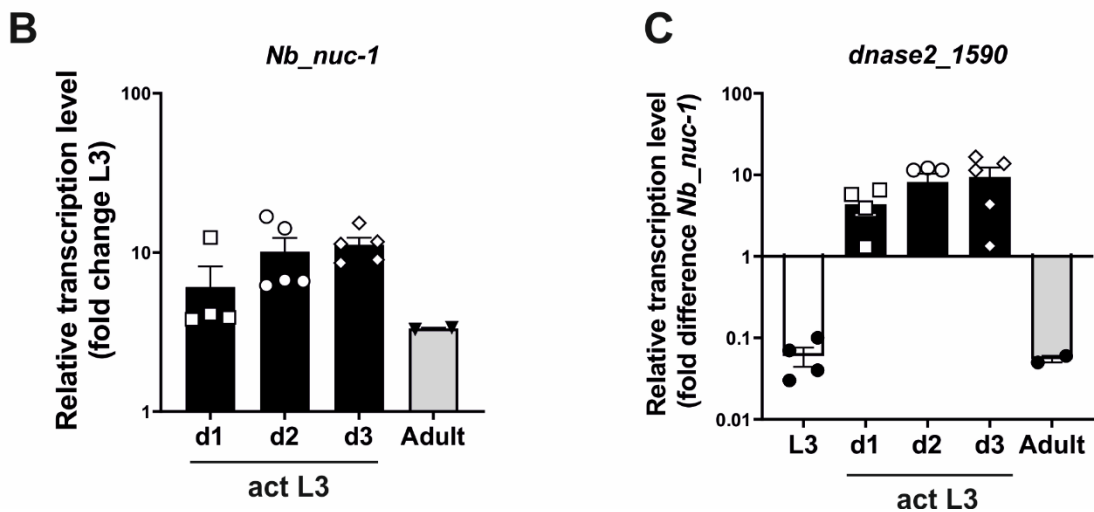

348

349

350 **Fig 6. Detection of a *nuc-1* orthologue in *Nippostrongylus brasiliensis*.** (A) Amino acid  
351 sequence of Nb\_NUC-1 (NBR\_0000088201) inferred by orthology to *C. elegans* NUC-1.  
352 Signal peptide cleavage site (blue arrow) and HKD motifs are indicated (red border). (B)  
353 *Nb\_nuc-1* is upregulated in L3 following activation at 37°C. Transcript levels are shown relative  
354 to unactivated L3. (C) *Dnase2\_1590* transcript levels relative to *Nb\_nuc-1* in different life cycle  
355 stages and culture of L3 at 37°C up to 3 days. Interleaved scatter plot with bars and mean ±  
356 sem of 2 independent experiments with 2-3 biological replicates.

357



## 358 Discussion

359 Nanoparticles, including extracellular vesicles (EVs), have become an important tool for the  
360 delivery of cargo including drugs, proteins, and nucleic acids to mammalian cells both in vitro  
361 and in vivo. EVs released by cells include microvesicles, exosomes, and apoptotic bodies,  
362 which differ in their biogenesis and size. However, while EVs have been described in secreted  
363 products of many helminths and suggested to be involved in signalling to the host [26],  
364 utilisation as vehicles to deliver functional cargo to parasitic helminths remains unexplored.

365 Here, we demonstrate that CRISPR/Cas9-mediated gene editing of *N. brasiliensis* is  
366 achievable using VSV-G-pseudotyped EVs (NanoMEDIC) for the delivery of RNP complexes.  
367 NanoMEDIC induced DNA double strand breaks, and homology directed repair was achieved  
368 through simultaneous delivery of a ssODN template via VSV-G-pseudotyped EVs (Fig. 1B).  
369 Edited transcripts were detected by RT-PCR, demonstrating that EVs can access cells of  
370 tissues actively expressing the gene of interest. Furthermore, gene disruption and the  
371 introduction of a repair template encoding 6 stop codons led to measurable reduction of target  
372 gene expression (*dnase2*), providing proof of principle that the technique can be employed for  
373 the identification and characterisation of molecules in parasites involved in disease processes.

374 As in previous studies with *Strongyloides stercoralis* [7], in the absence of a HDR template  
375 we could not detect smaller insertions or deletions following NHEJ. However, large genetic  
376 deletions of up to 500 bp in length following NHEJ have been described in *S. stercoralis* [7]  
377 and *Schistosoma mansoni* [26]. Due to the PCR design in our study, with primers spanning  
378 exon 2 to exon 4 of the DNase II gene, the presence of larger deletions cannot be excluded.  
379 However, detection of large deletions by whole genome sequencing may be challenging, as  
380 targeting tissues with direct access to EVs will result in mosaic genomes. The high abundance  
381 of wild type alleles masking edited genes has also been an issue in *S. stercoralis* [7]. While  
382 not reaching significance in our readouts so far, some reduction in transcript and DNase  
383 activity was observed in the absence of HDR, such that optimisation of NanoMEDIC  
384 production and purity may lead to improved gene disruption by NEHJ. However, consistent

385 with previous studies in other species [7,19], gene disruption is more effective when HDR is  
386 employed, and it facilitates detection of edited genes by providing unique primer binding sites.  
387 Interestingly, while a ssODN template was sufficient to achieve HDR in *N. brasiliensis* L3 in  
388 this study, a double stranded DNA template was necessary for repair in *S. stercoralis* following  
389 injection of the gonad [7]. This may be indicative of different repair mechanisms in somatic  
390 and germline cells, as previously described in *C. elegans* [27].

391 Direct injection into the gonad has the advantage of potentially generating homozygous  
392 offspring, whereas NanoMEDIC targets tissues with direct access to EVs. The EVs used in  
393 this study are similar in size to lentiviral particles (~150-200 nm) and possess a cell membrane-  
394 derived envelope expressing VSV-G. Lentiviral particles can access cells in the intestine of *N.*  
395 *brasiliensis* L3, and interference with expression of secreted acetylcholinesterases suggests  
396 that they can also access subventral glands [5]. This is important, as it suggests that  
397 NanoMEDIC may be utilised for targeting tissues expressing secreted proteins, as shown here  
398 for the DNase II. The same study showed that lentiviral particles can gain access to the  
399 germline, as integrated viral genomes were evident in a small proportion of the F1 generation  
400 [5]. The route to the germline is unclear, and further studies are required to determine whether  
401 this is similarly possible with NanoMEDIC.

402 Although we have shown that *N. brasiliensis* could be transduced with lentivirus, the  
403 transgene expression cassettes were subject to epigenetic silencing, and RNAi could not be  
404 maintained following development to adult stages [5]. CRISPR/Cas9-mediated gene editing  
405 offers a means to circumvent these problems, as more stable expression should be possible  
406 by site-directed integration of transgenes into regions less prone to epigenetic silencing.  
407 Lentiviral delivery of a Cas9 expression cassette has been superseded in *S. mansoni* by  
408 lipofection of in vitro assembled RNP complexes and simultaneous delivery of an HDR  
409 template by electroporation [19]. Furthermore, RNP complexes outperformed plasmid DNA-  
410 encoded Cas9 expression cassettes in *Strongyloides* [7]. Unlike *Strongyloides*, most parasitic  
411 nematodes do not have a free-living phase to facilitate microinjection. Using EVs for delivery  
412 of pre-assembled RNP complexes [12,29-31] and HDR templates [22] thus offers an

413 alternative to techniques employed thus far, and pseudotyping EVs with VSVG allows for  
414 receptor-mediated uptake similar to viral transduction [12,29-31].

415 Due to their short half-life, RNPs are rapidly degraded, resulting in precise site-directed  
416 editing with low off-target frequencies [32]. Another major advantage is that RNPs are  
417 produced and assembled in mammalian cell lines for which optimised expression systems are  
418 readily available, avoiding lengthy optimisation of Cas9 expression cassettes for expression  
419 in the respective parasite. Use of mammalian cell lines facilitates cost effective, large scale  
420 production of EVs. Furthermore, in contrast to other vesicular delivery approaches relying on  
421 stochastic uptake of RNPs [29] or fusion of SpCas9 to Gag [27], NanoMEDIC utilise the Gag  
422 and FRB-FKB12 homing system to actively incorporate RNPs into budding EVs, and contain  
423 an average of seven Cas9 molecules per vesicle [12]. Moreover, VSV-G and Gag actively  
424 mediate the release of EVs from cells resulting in average titres in the range of  $1 \times 10^{10}$   
425 particles per ml in our studies (S2 Fig).

426 Further optimisation of preparation and delivery of EVs will be necessary to improve editing  
427 efficiencies. Nanoflow analysis showed that NanoMEDIC preparations contained up to 90%  
428 exosomes (S2 Fig). Concentration in spin columns resulted in slightly less exosome (vesicles  
429 <100 nm) content than polymer-based precipitation (S2 Fig). NanoMEDIC have an average  
430 size of ~150 nm, and DNA is predominantly taken up by microvesicles (~150 nm) on  
431 electroporation [22]. The high content of exosomes is likely to saturate available receptors and  
432 impair effective uptake by NanoMEDIC. Polymer-based precipitation results in large quantities  
433 of lipids which may compete with available LDL receptors. Improved purity may thus require  
434 affinity chromatography [12] or a combination of filter columns [33].

435 In addition to loss of gene function by gene disruption, CRISPR/Cas9 provides a means to  
436 integrate foreign genes and expression cassettes via HDR [34]. Introduction of a traceable  
437 reporter or tag would allow sorting or enrichment of mutant larvae. It would also help to define  
438 the limitations of the EV delivery system in terms of which tissues can be accessed and  
439 manipulated, and facilitate investigation of gene expression patterns. For such studies,  
440 targeting a constitutively expressed, common gene such as tubulin, might be more effective.

441 Introduction of a reporter would require delivery of a dsDNA donor. Utilisation of a dsDNA  
442 template might allow editing in a wider range of tissues and improve HDR efficiencies as  
443 dsDNA templates usually have longer homology arms. Delivery of dsDNA via EVs is limited  
444 by their loading capacity, with an optimal length of DNA up to 750 bp but not exceeding 1000  
445 bp [22], although loading capacities might be improved through optimisation of electroporation  
446 conditions [22,35].

447 In summary, we have demonstrated that EVs can be utilised as a vehicle to deliver  
448 functional cargo to a parasitic nematode and achieve CRIPSR/Cas9-mediated gene editing.  
449 Although the methodology clearly needs further development and optimisation, it should be  
450 applicable to a wide range of species, and could provide a new means for genetic manipulation  
451 of this important group of pathogens.

452

## 453 **Materials and Methods**

### 454 **Ethics Statement**

455 This study was approved by the Animal Welfare Ethical Review Board at Imperial College  
456 London, and was licensed by and performed under the UK Home Office Animals (Scientific  
457 Procedures) Act Personal Project Licence number PFA8EC7B7: 'Immunity and  
458 immunomodulation in helminth infection'.

459

### 460 **Expression of recombinant DNase II in yeast**

461 The coding sequence of *dnase2\_1590* was amplified from *N. brasiliensis* cDNA omitting the  
462 signal peptide and stop codon and cloned into into pPICZalpha-A downstream of the coding  
463 sequence for the *Saccharomyces cerevisiae*  $\alpha$ -mating secretion factor and in frame with an  
464 N-terminal myc and 6xHis Tag. PCR was carried out using Q5 polymerase (NEB) according  
465 to manufacturer's recommendations with 500 nM of the following primers (lower case  
466 indicating nucleotides added for cloning purposes, restriction site underlined):

467 F-5'-aagctGAATTCGGTCTGAGTTGCAAGAACATGGAGG-3'

468 R-5-ttttgtTCTAGAGCGGTTTTGTTTGTCTTCTTGCTCG-3´

469 Following transformation of *Pichia pastoris* X-33, protein expression was optimised for  
470 single colonies and scaled up following the EasySelect Pichia expression protocol (Invitrogen).  
471 His-tagged proteins were purified from yeast supernatants by Ni-NTA resin affinity  
472 chromatography and protein concentration determined by Bradford assay.

473

#### 474 **Antibody production and western blotting**

475 A polyclonal antiserum to *N. brasiliensis* recombinant DNase II was raised by subcutaneous  
476 immunisation of a rat with 100 µg protein emulsified in alum, followed by 3 boosts of 50 µg  
477 protein via the same route at weeks 4, 6 and 8, and the animal bled at week 9. Western blotting  
478 was performed via standard procedures following resolution of 5 µg parasite proteins by SDS-  
479 12% polyacrylamide gel electrophoresis and blotting to polyvinylidene difluoride membrane.  
480 Rat anti-DNase II was used at 1:500 dilution, rabbit anti-rat IgG-horseradish peroxidase  
481 (Sigma) used as secondary antibody and the blot visualised using enhanced  
482 chemiluminescence western blotting detection reagents (Amersham Bioscience).

483

#### 484 **RGR-vector construction**

485 For facilitated cloning of synthesised sgRNA oligos, a NheI restriction site was introduced into  
486 the RGR expression vector (pL-5LTR-RGR(DMD#1)-AmCyan-A, Addgene plasmid #138482).  
487 To do this, the entire sequence between two SpeI restriction sites flanking the RGR region  
488 was amplified by PCR adding an NheI and AvrII restriction site to the 3´ end and used to  
489 replace the original sequence via SpeI and AvrII to allow for cloning of gRNA coding regions  
490 via KpnI and NheI. PCR was carried out in 50 µl reactions using Q5 polymerase (NEB)  
491 according to manufacturer's recommendations with 1 ng of the RGR plasmid as template and  
492 500 nM of the following primers (lower case indicating nucleotides added for cloning purposes  
493 and restriction site underlined): F-5´-GCTTGCATGCCGACATGGATTATTGACTAGTCCC-3´;  
494 R-5´-attgaCCTAGGGCTAGCTCTAGAGCGGCCGTCCCATTGCCATGC-3.

495 The CRISPR/Cas-derived RNA-guided endonucleases (RGEN) algorithm was used to  
496 predict *Streptococcus pyogenes* (Sp) Cas9 gRNA targets with a 5'-NGG-3' Protospacer  
497 Adjacent Motif (PAM) in exon 3 of the *dnase-2* gene and subsequent off-target screening  
498 against the *N. brasiliensis* genome. Oligonucleotides encoding gRNAs for subsequent  
499 integration into the RGR plasmid via KpnI and NheI were synthesized (GeneArt, Thermo  
500 Fisher Scientific) with the following structure: 5'-KpnI-inverted first 6 nt of the guide RNA-HH  
501 ribozyme-guide RNA-gRNA scaffold-HDV ribozyme-NheI-3' (complete sequence Suppl 3).  
502 Plasmids were maintained in NEB stable *Escherichia coli* (NEB). Positive transformants were  
503 selected on LB agar plates containing 50 µg ml<sup>-1</sup> ampicillin. Constructs were verified for error-  
504 free integration of transgenes by routine Sanger sequencing (Eurofins Genomics).

505

#### 506 **Extracellular vesicle production**

507 NanoMEDIC were produced in HEK293T cells maintained in Dulbecco's Modified Eagle's  
508 Medium (DMEM) at 37°C, 10% foetal calf serum (FCS), 2 mM L-glutamine, 100 units ml<sup>-1</sup>  
509 penicillin and 100 µg ml<sup>-1</sup> streptomycin, as described previously [12] with some modifications.  
510 In brief, per well of a 6-well plate, 3 x 10<sup>6</sup> cells were transfected with 1.25 µg of gRNA-encoding  
511 plasmid, 1.25 µg of pHLS-EF1a-FRB-SpCas9-A (Addgene plasmid #138477), 1.25 µg of  
512 pHLS-EF1a-FKBP12-Gag<sup>HIV</sup> (Addgene plasmid #138476), 250 ng of pcDNA1- Tat<sup>HIV</sup>  
513 (Addgene plasmid #138478) and 500 ng of pMD2.G (VSV-G) (Addgene plasmid #12259),  
514 using Lipofectamine 2000 at a ratio of 1:2.5 (Life Technologies). After 16 hours, the  
515 transfection medium was replaced with 2 ml of reduced serum culture medium (5% FCS)  
516 supplemented with 300 µM A/C heterodimerization agent (formerly AP21967, Takara BioInc),  
517 20 mM HEPES and 10 µM cholesterol (balanced with methyl-β-cyclodextrin, Sigma) [36].  
518 VSV-G-EVs were produced in HEK293T cells following transfection of 3 x 10<sup>6</sup> cells with 1.25  
519 µg of pMD2.G per well of a 6-well plate with Lipofectamine 2000 at a ratio of 1:2.5. The cell  
520 culture supernatant was changed after 18 hours as for NanoMEDIC, omitting the  
521 heterodimerisation agent. After an additional incubation of 48 hours at 37°C and 10% CO<sub>2</sub>,

522 the EV-containing cell supernatant was harvested, centrifuged at 2,000 x *g* for 20 min at 4°C  
523 and passed through a 0.45 µm Acrodisc syringe filter. NanoMEDIC and VSV-G-EVs were  
524 generally concentrated using 10 kDa vivaspin columns and washed twice with serum-free  
525 growth medium (NanoMEDIC) or trehalose buffer (10% trehalose in PBS) (VSV-G-EVs).  
526 Following centrifugation at 4,000 x *g* for 15 min at 4°C, the flow-through was discarded and  
527 EVs gently resuspended in 2 ml of the respective buffer before aliquoting into cryovials and  
528 storage at -80°C. For enrichment by polymer-based precipitation, 4 ml of Lenti-X concentrator  
529 (Takara Bio) was added to 12 ml of cell supernatant and the mixture incubated at 4°C with  
530 gentle agitation for 18 hours. Precipitated EVs were then pelleted by centrifugation at 3000 x  
531 *g* for 45 min and 4C and resuspended in 2 ml of trehalose buffer.

532

### 533 **Analysis of extracellular vesicles**

534 The composition of EVs was analysed by Western blot and Nano-flow cytometry. Western  
535 blotting was performed via standard procedures following resolution of 12 µl concentrated EV  
536 preparations by SDS-12% polyacrylamide gel electrophoresis under reducing (Cas9, VSV-G)  
537 or non-reducing (CD63, CD81) conditions. Primary antibodies were used at 1:1000 dilution:  
538 mouse anti-human CD63 (clone H5C6, Biolegend); mouse anti-human CD81 (TAPA-1) (clone  
539 5A6, Biolegend); rabbit anti-VSV-G (clone ); mouse anti-CRISPR (Cas9) (clone 7A9,  
540 Biolegend).

541 Concentrated NanoMEDIC preparations were analysed for their nanoparticle content by  
542 nano-flow cytometry using a NanoAnalyzer calibrated against trehalose buffer. Before  
543 acquisition, samples were diluted 1:100 and 1:200 in trehalose buffer. The concentration of  
544 particles with diameters larger than 100 nm was determined following gating using the  
545 NanoFCM™ Silica Nanospheres Cocktail (S16M-Exo, diameter:68~155 nm) as a standard.

546

### 547 **Loading of VSV-G-EVs with HDR templates**

548 Oligonucleotides encoding the HR templates (S3 Fig) were synthesized (Invitrogen) and  
549 reconstituted in nuclease-free water at a concentration of 1 µg µl<sup>-1</sup>. VSV-G-EVs were then



550 loaded with ssDNA as described previously [22]. In brief, 5 µg of ssDNA were added to 95 µl  
551 of VSV-G-EVs in trehalose buffer and EVs then transferred to a 1 mm electroporation cuvette  
552 (BioRad) placed on ice. EVs were electroporated by exponential decay with two pulses at 400  
553 V and 125 µF using a GenePulser Xcell electroporator (Bio-Rad). Cuvettes were placed on  
554 ice immediately after electroporation and incubated on ice for 20 min. EVs were then  
555 transferred to fresh microfuge tubes and the cuvette washed with one volume (100 µl) of RPMI  
556 and added to the tube. To alleviate aggregation, EDTA was added to a final concentration of  
557 1 mM and EVs incubated at room temperature for 15 min, gently resuspended several times  
558 during incubation [22].

559

#### 560 **Parasite infection, recovery and exposure to EVs**

561 *N. brasiliensis* were maintained in male SD rats, and infective larvae isolated from faecal  
562 cultures using a Baermann apparatus. Larvae were activated to feed as previously described  
563 [15] for 48 to 72 hrs in RPMI1640, 0.65% glucose, 2 mM L-glutamine, 100 U ml<sup>-1</sup> penicillin,  
564 100 µg ml<sup>-1</sup> streptomycin, 100 µg ml<sup>-1</sup> gentamicin, 20 mM HEPES, 2% rat serum (worm culture  
565 medium), then washed twice in serum-free medium prior to exposure to EVs. Per well of a 12-  
566 well plate, approximately 3,000 - 4,000 activated L3 were exposed to 200 µl NanoMEDIC  
567 and/or 200 µl of VSV-G-EVs, volumes adjusted to 1 ml with serum-free medium and 10 µg ml<sup>-1</sup>  
568 polybrene (Sigma) and 200 µg ml<sup>-1</sup> gentamicin added. EV preparations in control worms  
569 were substituted with HEK293T cell supernatant from untransfected cells. Following  
570 incubation for 18 to 24 hrs, worms were transferred to a 15 ml tube and washed twice in 10  
571 ml of warm serum-free worm medium containing 1 mM EDTA with centrifugation at 150 x g  
572 for 1 min between washes. Worms were then resuspended in 2 ml complete worm medium  
573 (or serum-free medium when testing for ES products) and incubated for another 24 to 48 hours  
574 at 37°C, 5% CO<sub>2</sub>.

575

576

577



## 578 **Detection of HDR in genomic DNA**

579 For integration studies in L3s, worms were washed twice in 10 ml of warm PBS at 72 hrs post  
580 exposure to EVs and genomic DNA isolated using the DNeasy Blood and Tissue DNA  
581 extraction kit (Qiagen). Modified DNA was detected by 2-step PCR with an  
582 annealing/extension temperature of 72°C using Q5 polymerase and the following primers (F:  
583 forward; R: reverse): e2F: 5'-GATTCGGCTATTGGTGCAACTGTTAAGC-3'; e3F: 5'-  
584 ACCTCAAATTGCCTACAACGAC-3'; e3R: 5'-GGAATCTTGGCACACTGTGTACCAGC-3';  
585 e4R: 5'-TCGAGCCTGATTCGGGGTAGTCG-3'; StopF: 5'-  
586 TAAGTGACTAGGTAAGTACTGAGTAGC-3'; StopR: 5'-  
587 ATCCCCGTGCTACTCAGTTACCTAGTCACTTA-3'.

588

## 589 **Preparation of DNA libraries and deep sequencing**

590 DNA libraries for deep sequencing were made using the NEBNext Ultra II DNA library  
591 preparation kit (NEB) according to the manufacturer's instructions. Sequencing was performed  
592 by the London Institute of Medical Sciences Genomics facility. Reads were mapped to the  
593 predicted PCR products from wild type and edited alleles using Bowtie2 [37]. SNPs and indels  
594 were mapped using samtools mPileup [38]. We then used Varscan2 [39] using the commands  
595 pileup2snp and pileup2indel to identify putative SNPs and indels respectively, requiring a  
596 minimum average quality of 20 and setting a minimum frequency of 1 in 10000 to enable low  
597 frequency alterations to be detected. Data were read into R using the read.table function and  
598 comparison of the different files enabled called SNPs that were present in the untransfected  
599 control to be removed as likely sequencing errors or PCR artefacts. Line plots indicating the  
600 frequency of SNPs at each position divided by total reads mapping to that position were  
601 constructed to illustrate the distribution of mutations along the template.

602

## 603 **Reverse Transcription PCR (RT-PCR) and Real-Time quantitative PCR (RT-qPCR)**

604 Total RNA was extracted using TRIreagent (Sigma) and converted to cDNA using an iScript  
605 cDNA kit (Biorad) following removal of contaminating genomic DNA by DNase I. RT-PCR was

606 carried out using Q5 DNA polymerase (NEB) according to the manufacturer's  
607 recommendations. RT-qPCR was carried out with a Step-One PLUS Fast Real-time PCR  
608 cyclers (Applied Biosystems) under standard fast cycling conditions using PowerUP SYBR  
609 Green PCR Master Mix (Applied Biosystems) and 250 nM target gene specific forward and  
610 reverse primers. PCR amplification efficiencies were established for each primer pair [40] and  
611 ranged between 1.9 and 2.1. Cycle threshold (Ct) values of target genes were normalised to  
612 the geometric mean of *eif-3C* (NBR\_0001150401) and *idhg-1* (NBR\_0000658601) [5] and  
613 calibrated to the mean untreated control (wild type) samples for relative quantification by the  
614 comparative Ct method [41]. The primers were (forward (F), reverse (R)): *Nb-nuc-1* F: 5'-  
615 TGACGAACCATAACAACGGCA-3', R: 5'- TGGAACACTGTGGATCAGCC-3'; *eif-3C* F: 5'-  
616 GAACACGTTGTAGCTGCGTCA-3', R: 5'-AATAGGTTCTCAGCGATTCCGTT-3'; *idhg-1* F:  
617 5'-CAGAAATTGGGAGACGGCCT-3', R: 5'-CCGAGAAACCAGCTGCATAGA-3';  
618 *dnase2\_1590\_E6F* : 5'-TGGAAACTTGGAGAAACGGTGCTG-3'; *dnase2\_1590\_E7R*: 5'-  
619 ACATCTCCGATACAACTAGGGGCTCC-3'; e2F: 5'-  
620 GATTCGGCTATTGGTGCAACTGTTAAGC-3'; StopR: 5'-  
621 ATCCCCGTGCTACTCAGTTACCTAGTCACTTA-3'.

622

### 623 **DNase activity assay**

624 Supernatant collected from worms cultured in serum-free medium was thawed and all  
625 reactions prepared on ice. Per test sample, 500 ng of a plasmid DNA substrate in 10  $\mu$ l  
626 nuclease free water was placed in PCR tubes and a 10  $\mu$ l droplet of worm supernatant  
627 transferred to the side of the tube. Reactions were initiated by centrifugation and samples  
628 placed immediately into a PCR cycler pre-warmed to 37°C and incubated for 2 to 10 min. After  
629 heat inactivation at 75°C for 10 min, 4  $\mu$ l of agarose loading dye was added and 10  $\mu$ l of the  
630 sample separated on a 1% agarose gel.

631 To assess the dynamics of DNase secretion by L3, worms were extensively washed in  
632 serum-free medium, counted and resuspended at 2500 L3 ml<sup>-1</sup>. Per time point tested, 80  $\mu$ l of  
633 worm suspension (200 L3) was added to 20  $\mu$ l of plasmid DNA solution (2  $\mu$ g in 20  $\mu$ l RPMI).

634 Following incubation for 15, 30, 60 or 120 min at 37°C, 5% CO<sub>2</sub>, 80 µl of supernatant was  
635 carefully aspirated and transferred to a PCR tube. Samples were immediately frozen at -20°C.  
636 For analysis, tubes were placed directly from the freezer into a PCR cycler prewarmed to 75°C  
637 and heat inactivated for 10 min. Loading dye was added and the samples separated on a 1 %  
638 agarose gel.

639

#### 640 **Statistics**

641 Treatment groups were analysed for significant differences with the Kruskal-Wallis test and  
642 Dunns *post-hoc* test in relation to the control group. Values are expressed as the median with  
643 range or the mean ± SEM, and significant differences were determined using GraphPad Prism.  
644 P values of <0.05 were considered significant, \*p<0.05.

645

#### 646 **Author Contributions**

647 Conceived and designed the experiments: JH MES PS. Performed the experiments: JH SG  
648 MES PS. Analyzed the data: JH PS MES. Wrote the paper: JH MES PS.

649

#### 650 **Acknowledgements**

651 This study was funded by a BBSRC grant to MES, PS and JH (BB/S001085/1).

652

#### 653 **References**

- 654 1. Jourdan PM, Lamberton PH, Fenwick A, Addiss, DG. Soil-transmitted helminth  
655 infections. *Lancet* 2018; 391:252–65.
- 656 2. Kaplan RM. Biology, Epidemiology, Diagnosis, and Management of Anthelmintic  
657 Resistance in Gastrointestinal Nematodes of Livestock. *Vet Clin North Am Food Anim*  
658 *Pract.* 2020; 36 (1):17-30.
- 659 3. Selkirk ME, Huang SC, Knox DP, Britton C. The development of RNA interference

- 660 (RNAi) in gastrointestinal nematodes. *Parasitology*. 2012; 139 (5):605-12.
- 661 4. Castelletto ML, Gang, SS, Hallem, EA. Recent advances in functional genomics for  
662 parasitic nematodes of mammals. *J Exp Biol*. 2020; 223 (Pt Suppl 1).
- 663 5. Hagen J, Sarkies P, Selkirk ME. Lentiviral transduction facilitates RNA interference in  
664 the nematode parasite *Nippostrongylus brasiliensis*. *PLoS Pathog*. 2021; 17:1–23.
- 665 6. Finkelshtein D, Werman A, Novick D, Barak S, Rubinstein M. LDL receptor and its family  
666 members serve as the cellular receptors for vesicular stomatitis virus. *Proc Natl Acad  
667 Sci U S A*. 2013; 110 (18):7306-11.
- 668 7. Gang SS, Castelletto ML, Bryant AS, Yang E, Mancuso N, Lopez JB, et al. Targeted  
669 mutagenesis in a human-parasitic nematode. *PLoS Pathog*. 2017; 13 (10):e1006675.
- 670 8. Quinzo MJ, Perteguer MJ, Brindley PJ, Loukas A, Sotillo J. Transgenesis in parasitic  
671 helminths: a brief history and prospects for the future. *Parasit Vectors* 2022; 15 (1):110.
- 672 9. Douglas B, Wei Y, Li X, Ferguson A, Hung LY, Pastore C, et al. Transgenic expression  
673 of a T cell epitope in *Strongyloides ratti* reveals that helminth-specific CD4+ T cells  
674 constitute both Th2 and Treg populations. *PLoS Pathog*. 2021; 17:1–29.
- 675 10. Liu C, Grote A, Ghedin E, Unnasch TR. CRISPR-mediated Transfection of *Brugia  
676 malayi*. *PLoS Negl Trop Dis*. 2020; 14 (8):e0008627.
- 677 11. Liu C, Mhashilkar AS, Chabanon J, Xu S, Lustigman S, Adams JH, et al. Development  
678 of a toolkit for piggyBac-mediated integrative transfection of the human filarial parasite  
679 *Brugia malayi*. *PLoS Negl Trop Dis*. 2018; 12 (5):e0006509.
- 680 12. Gee P, Lung MS, Okuzaki Y, Sasakawa N, Iguchi T, Makita Y, et al. Extracellular  
681 nanovesicles for packaging of CRISPR-Cas9 protein and sgRNA to induce therapeutic  
682 exon skipping. *Nat. Commun*. 2020; 11:4–20.
- 683 13. Bouchery T, Moyat M, Sotillo J, Silverstein S, Volpe B, Coakley G, et al. Hookworms  
684 Evade Host Immunity by Secreting a Deoxyribonuclease to Degrade Neutrophil  
685 Extracellular Traps. *Cell Host Microbe*. 2020; 27:277-89.
- 686 14. Sotillo J, Sanchez-Flores A, Cantacessi C, Harcus Y, Pickering D, Bouchery T, et al.  
687 Secreted proteomes of different developmental stages of the gastrointestinal nematode

- 688 Nippostrongylus brasiliensis. Mol. Cell. Proteomics. 2014; 13 (10):2736–51.
- 689 15. Huang SC, Chan DT, Smyth DJ, Ball G, Gounaris K, Selkirk ME. Activation of  
690 Nippostrongylus brasiliensis infective larvae is regulated by a pathway distinct from  
691 the hookworm Ancylostoma caninum. Int J Parasitol. 2010; 40 (14):1619-28.
- 692 16. Schäfer P, Cymerman IA, Bujnicki JM, Meiss G. Human lysosomal DNase II $\alpha$  contains  
693 two requisite PLD-signature (HxK) motifs: Evidence for a pseudodimeric structure of the  
694 active enzyme species. Protein Science. 2007; 16 (1):82-91.
- 695 17. Park J, Bae S, Kim JS. Cas-Designer: A web-based tool for choice of CRISPR-Cas9  
696 target sites. Bioinformatics. 2015; 31:4014–16.
- 697 18. Bae S, Park J, Kim JS. Cas-OFFinder: a fast and versatile algorithm that searches for  
698 potential off-target sites of Cas9 RNA-guided endonucleases. Bioinformatics. 2014;  
699 30:1473–75.
- 700 19. Ittiprasert W, Mann VH, Karinshak SE, Coghlan A, Rinaldi G, Sankaranarayanan G, et  
701 al. Programmed genome editing of the omega-1 ribonuclease of the blood fluke,  
702 Schistosoma mansoni. Elife 2019; 8:1–27.
- 703 20. Hug N, Longman D, Cáceres JF. Mechanism and regulation of the nonsense-mediated  
704 decay pathway. Nucleic Acids Res. 2016; 44:1483–95.
- 705 21. Mangeot PE, Dollet S, Girard M, Ciancia C, Joly S, Peschanski M, et al. Protein Transfer  
706 Into Human Cells by VSV-G-induced Nanovesicles. Mol. Ther. 2011; 19:1656–66.
- 707 22. Lamichhane TN, Raiker RS, Jay, SM. Exogenous DNA loading into extracellular vesicles  
708 via electroporation is size-dependent and enables limited gene delivery. Mol. Pharm.  
709 2015; 12:3650–57.
- 710 23. Meyer C, Losacco J, Stickney Z, Li L, Marriott G, Lu B. Pseudotyping exosomes for  
711 enhanced protein delivery in mammalian cells. Int. J. Nanomedicine. 2017; 12, 3153–  
712 70.
- 713 24 Hedgecock EM, Sulston JE, Thomson JN. Mutations affecting programmed cell deaths  
714 in the nematode Caenorhabditis elegans. Science 1983; 220:1277-9.
- 715 25 Wu YC, Stanfield GM, Horvitz HR. NUC-1, a Caenorhabditis elegans DNase II homolog,

- 716 functions in an intermediate step of DNA degradation during apoptosis. *Genes Dev.*  
717 2000; 14:536-48.
- 718 26. Drurey C, Maizels RM. Helminth extracellular vesicles: Interactions with the host  
719 immune system. *Mol Immunol.* 2021; 137:124-133.
- 720 27. van Schendel R, Roerink SF, Portegijs V, van den Heuvel S, Tijsterman M. Polymerase  
721 Theta is a key driver of genome evolution and of CRISPR/Cas9-mediated mutagenesis.  
722 *Nat Commun.* 2015; 6:7394.
- 723 28. Sankaranarayanan G, Coghlan A, Driguez P, Lotkowska ME, Sanders M, Holroyd N, et  
724 al. Large CRISPR-Cas-induced deletions in the oxamniquine resistance locus of the  
725 human parasite *Schistosoma mansoni*. *Wellcome Open Res.* 2020; 5, 1–15.
- 726 29. Mangeot PE, Risson V, Fusil F, Marnef A, Laurent E, Blin J, et al. Genome editing in  
727 primary cells and in vivo using viral-derived Nanoblades loaded with Cas9-sgRNA  
728 ribonucleoproteins. *Nat. Commun.* 2019; 10, 45.
- 729 30. Campbell LA, Coke LM, Richie CT, Fortuno LV, Park AY, Harvey BK. Vesicle-Mediated  
730 Delivery of CRISPR/Cas9 Ribonucleoprotein Complex for Inactivating the HIV Provirus.  
731 *Mol. Ther.* 2019; 27:151–63.
- 732 31. Montagna C, Petris G, Casini A, Maule G, Franceschini GM, Zanella I, et al. VSV-G-  
733 Enveloped Vesicles for Traceless Delivery of CRISPR-Cas9. *Mol. Ther. Nucleic Acids.*  
734 2018; 12:453–62.
- 735 32. Vakulskas CA, Behlke MA. Evaluation and Reduction of CRISPR Off-Target Cleavage  
736 Events. *Nucleic Acid Ther.* 2019; 29 (4):167-74.
- 737 33. Brennan K, Martin K, FitzGerald SP, O'Sullivan J, Wu Y, Blanco A, et al. A comparison  
738 of methods for the isolation and separation of extracellular vesicles from protein and lipid  
739 particles in human serum. *Sci. Rep.* 2020; 10 (1): 1039.
- 740 34. Chu VT, Weber T, Wefers B, Wurst W, Sander S, Rajewsky K, et al. Increasing the  
741 efficiency of homology-directed repair for CRISPR-Cas9-induced precise gene editing  
742 in mammalian cells *Nat Biotechnol.* 2015; 33:543-8.
- 743 35. Lennaard AJ, Mamand DR, Wiklander RJ, El Andaloussi S, Wiklander OP. Optimised

- 744 Electroporation for Loading of Extracellular Vesicles with Doxorubicin. *Pharmaceutics*  
745 2021; 14 (1):38.
- 746 36. Chen Y, Ott CJ, Townsend K, Subbaiah P, Aiyar A, Miller WM. Cholesterol  
747 Supplementation During Production Increases the Infectivity of Retroviral and Lentiviral  
748 Vectors Pseudotyped with the Vesicular Stomatitis Virus Glycoprotein (VSV-G) *Biochem*  
749 *Eng J.* 2009; 44:199-207.
- 750 37. Langmead B, Salzberg SL. Fast gapped-read alignment with Bowtie 2. *Nat Meth.* 2012;  
751 9:357–59
- 752 38. Li H, Handsaker B, Wysoker A, Fennell T, Ruan J, Homer N, et al. The Sequence  
753 Alignment/Map format and SAMtools. *Bioinformatics.* 2009; 25:2078–79.
- 754 39. Koboldt DC, Zhang Q, Larson DE, Shen D, McLellan MD, Lin L, et al. VarScan 2:  
755 Somatic mutation and copy number alteration discovery in cancer by exome  
756 sequencing. *Genome Res.* 2012; 22:568–76.
- 757 40. Pfaffl MW. A new mathematical model for relative quantification in real-time RT-PCR.  
758 *Nucleic Acids Res.* 2001; 29, e45.
- 759 41. Livak KJ, Schmittgen TD. Analysis of relative gene expression data using real-time  
760 quantitative PCR and the 2(-Delta Delta C(T)) Method. *Methods.* 2001; 25:402–8.
- 761

762 **Supporting Information**

763 **S1 Fig. Alignment of cDNA and derived amino acid sequences for MN938457.1**  
764 **(GenBank) and NBR\_00001590 (Wormbase ParaSite).**

765 **A cDNA sequence alignment**

|              |                                                               |      |
|--------------|---------------------------------------------------------------|------|
| MN938457.1   | AAATTTGAAGTCATGTGGACAATCTTCCTCATAATTCGCCCATCGTCGGGAATGTCGAT   | 60   |
| NBR_00001590 | -----ATGTGGACAATCTTCCTCATAATTCGCCCATCGTCGGGAATGTCGAT          | 48   |
|              | *****                                                         |      |
| MN938457.1   | GCAGGTCTGAGTTGCAAGAACATGGAGGGCAAAGACGTGGACTGGTTCGCTGCCGTAAAG  | 120  |
| NBR_00001590 | GCAGGTCTGAGTTGCAAGAACATGGAGGGCAAAGACGTGGACTGGTTCGCTGCCGTGAAA  | 108  |
|              | *****                                                         |      |
| MN938457.1   | CTACCTTCCAATGTGGACGAGAGGAAGGACGCACGTTTGCCTATTACGATTCCACACAA   | 180  |
| NBR_00001590 | TTACCTTCCAATGTGGACGAGAGGAAGGACGCACGTTTGCCTATTACGATTCCACACAA   | 168  |
|              | *****                                                         |      |
| MN938457.1   | ACTGGATGGAAGTTCAGCCCTCTACCGATTAACAGCACCAGATCCGCCATTGGTGAACAT  | 240  |
| NBR_00001590 | AATGGGTGGAAGTTCAGTCTCTACCGATTAACAGCACCAGATCCGGCTATTGGTGAACAT  | 228  |
|              | * ** *                                                        |      |
| MN938457.1   | GTTAAGCAACTCTACGACAGCGACAACCTCTATCACCTCAAATTCGCCTACAACGACGAC  | 300  |
| NBR_00001590 | GTTAAGCAACTCTACGACAGCGATAAATCTCTATCACCTCAAATTCGCCTACAACGACGAC | 288  |
|              | *****                                                         |      |
| MN938457.1   | CATCCACATGGACACGAGGACAAGTCTTCAAGCGGTCGAGGCCACAGCAAGGGTGTCTTG  | 360  |
| NBR_00001590 | CATCCACATGGACACGAGGATAAGTCTTCAAGCGGTCGAGGCCACAGCAAGGGTGTCTTG  | 348  |
|              | *****                                                         |      |
| MN938457.1   | GTGTTCCACATGAAACGGGGATTCTGGCTGGTACACAGTGTGCCAAGATTCCCTGACCCC  | 420  |
| NBR_00001590 | GTGTTCCACATGAAACGGGGATTCTGGCTGGTACACAGTGTGCCAAGATTCCCTGACCCC  | 408  |
|              | *****                                                         |      |
| MN938457.1   | GAAAAATACGACTACCCCGAATCCGGCTCGAAATTCGCCAGTCATTCATCTGCTGACG    | 480  |
| NBR_00001590 | GAAAAATACGACTACCCCGAATCAGGCTCGAAATTCGCCAGTCATTCATCTGCTGACG    | 468  |
|              | *****                                                         |      |
| MN938457.1   | TTGAGCTCTGATTTCTTCTTCTGACATCAGCCAATATCTGCGCTATTCAGGTCACGCCG   | 540  |
| NBR_00001590 | TTGAGCTCTGATTTCTTCTTCTGATATCAGCCAATATCTGCGCTATTCAGGTCACGCCG   | 528  |
|              | *****                                                         |      |
| MN938457.1   | TTCGTCATGAATCTGCCCGAAAATCACAAATTACTGGCACCATACCTGGTCGACGTGCAG  | 600  |
| NBR_00001590 | TTCGTCATGAATCTGCCCGAAAATCACAAATTACTGGCACCATACCTGGTCGATGTGCAG  | 588  |
|              | *****                                                         |      |
| MN938457.1   | GCAAAGAAGTCGCTAGGACGAGCTGATACCAAATTCACCTCGACTCATTCCTACCAGACA  | 660  |
| NBR_00001590 | GCAAAGAATCGCTAGGACGAGCTGACCCAAGTTCACCTCCACTCATTCCTACCAGACA    | 648  |
|              | *****                                                         |      |
| MN938457.1   | ATGGCGGAAAGCGATTACAGATTCTAGCGAAGCACAAGAAGTTCAACAACGACCTATGG   | 720  |
| NBR_00001590 | ATGGCGGAAAGCGATTACAGATTCTAGCGAAGCATAAGAAGTTCAACAACGACCTATGG   | 708  |
|              | *****                                                         |      |
| MN938457.1   | CACGATTTTCATCGCACTTTACTTCAAACCTCCCATGGCGGTGAAACTTGGAGAAACGGT  | 780  |
| NBR_00001590 | CACGATTTTCATCGCACTTTACTTCAAACCTCCCATGGCGGTGAAACTTGGAGAAACGGT  | 768  |
|              | *****                                                         |      |
| MN938457.1   | GCTGCCAAAAACGTCGGAACCAATGCGCGGTTGGATACAACGCTTACGACATTACCACA   | 840  |
| NBR_00001590 | GCTGCCAAAAACGTCGGAACCAATGCGCGGTTGGATATAAATGTGTACGACATACCCAA   | 828  |
|              | *****                                                         |      |
| MN938457.1   | GTGAAATTTCTGGACAAAGTCTACAACAGCTCCAAGGACCACTCCAAATGGGGAGTGTCA  | 900  |
| NBR_00001590 | GTGAAGATTTCTGGACAAAGTTTACAACAGCTCCAAGATCACTCCAAATGGGGAGTGTCA  | 888  |
|              | *****                                                         |      |
| MN938457.1   | ATGGAGAAGAAAGACCCGCTGCTTTGCATCGGAGATGTAAACCGACAGGAATCACAGTTC  | 960  |
| NBR_00001590 | ATGGAGAAGAGGGAGCCCTAGTTTGTATCGGAGATGTAAACCGACAGGAATCGCAGTTT   | 948  |
|              | *****                                                         |      |
| MN938457.1   | AAGCGCGGTGGTGGTGTCTGCTGCATGGAGGATGTCAAGCTGTGGAACACTTCCACGAT   | 1020 |
| NBR_00001590 | AAACGCGGTGGTGGTGTCTGCTGCATGGAGGATGAGAAGCTGTGGAACACTTCCACGAC   | 1008 |
|              | ** *****                                                      |      |
| MN938457.1   | TCGGTCAAGTCTTATTGAACTGCGGAGAAGTCCAAGAAAGGAAGAGTAAAGACGAGGAC   | 1080 |
| NBR_00001590 | TCGGTCAAACTTACTTGAACCTGCGGAGAAGTCCAAGAAAGGAAGAAATAAAGACGAGGAC | 1068 |
|              | *****                                                         |      |
| MN938457.1   | AACAAAACCGAGAGCAAACCAAGAAGCCGAGCAAGAAGACAAAACAAACCGCC         | 1134 |
| NBR_00001590 | AACAAAACGAAAGCAAACCAAGAAGCCGAGCAAGAAGACAAAACAAACCGC-          | 1121 |
|              | *****                                                         |      |



766 **B** Derived amino acid sequence alignment

```
MN938457.1      MWTIFLIIPAIVGNVDAGLSCKNMEGKDVDWFAAVKLPNSVDERKGRTFAYYDSTQTGWK      60
NBR_00001590   MWTIFLIIPAIVGNVDAGLSCKNMEGKDVDWFAAVKLPNSVDERKGRTFAYYDSTQNGWK      60
*****

MN938457.1      FSPLPINSTDSAIGATVKQLYDSDNSYHLKIAYNDDHPHGHEKSSSGRGHSGKGVLVFTI      120
NBR_00001590   FSPLPINSTDSAIGATVKQLYDSDNSYHLKIAYNDDHPHGHEKSSSGRGHSGKGVVFTI      120
*****

MN938457.1      ERGFVLVHVSVPFRFPDPEKYDYPESGSKFAQSFICTLSDFLPDISQYLRYSQVTPFVMN      180
NBR_00001590   ERGFVLVHVSVPFRFPDPEKYDYPESGSKFAQSFICTLSDFLPDISQYLRYSQVTPFVMN      180
*****

MN938457.1      LPENHKLLAPYLVDVQAKKSLGRADTKFTSTHSYQTMGGKRFTILAKHKKFNNDLWHDFI      240
NBR_00001590   LPENHKLLAPYLVDVQAKKSLGRADTKFTSTHSYQTMGGKRFTILAKHKKFDNDLWHDFI      240
*****

MN938457.1      ALYFKTPMAVETWRNGAAKNVGTQCGVGVNVYDITTVKILDKVYNSSKDHKSWGVSMEKK      300
NBR_00001590   ALYFKTPMAVETWRNGAAKNVGTQCGVGVNVYDITQVKILDKVYNSSKDHKSWGVSMEER      300
*****

MN938457.1      EPVVCIGDVNRQESQFKRGGGAVCMEDVKLWNTFHDSVKSYLNCGEVQERKSKDEDNKTE      360
NBR_00001590   EPLVCIGDVNRQESQFKRGGGAVCMEDVKLWNTFHDSVKSYLNCGEVQERKNKDEDNKTE      360
**.*

MN938457.1      SKPKKPSKKTNKTA      374
NBR_00001590   SKPKKPSKKTNKT-      373
*****
```

767

768 **S2 Fig. Analysis of extracellular vesicle preparations**

769

770 **A Analysis of extracellular vesicle production by western blot**

771 Extracellular vesicles (EV) or NanoMEDIC (Nano)-containing cell supernatants were  
772 concentrated using vivaspin columns (VIVA) or precipitation with Lenti-X concentrator (LX) as  
773 described in Materials and methods. Western blotting was performed following SDS-PAGE  
774 under reducing conditions to determine the presence of Cas9 and VSV-G, or under non-  
775 reducing conditions for the presence of CD63 and CD81.

776

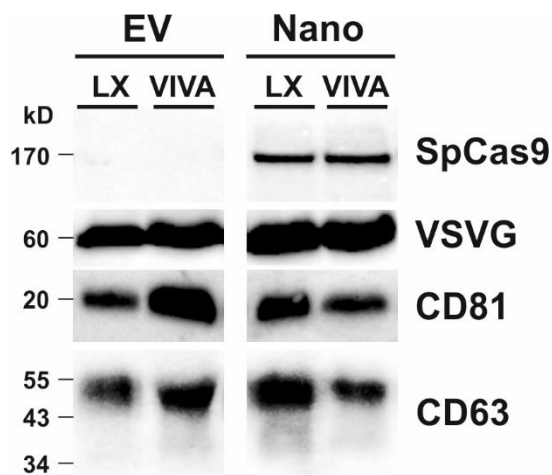

778

779

780 **B Analysis by Nano-flow cytometry**

781 NanoMEDIC preparations concentrated by ultrafiltration (VIVAspin) or precipitation (Lenti-X)  
782 were analysed for their nanoparticle content by nano-flow cytometry as described in Materials  
783 and methods. The table shows the concentration and proportion of particles with diameters  
784 larger than 100 nm.

785

|                                             | <i>Lenti-X</i>              | <i>VIVAspin</i>             |
|---------------------------------------------|-----------------------------|-----------------------------|
| <i>Sample concentration</i>                 | 1.88 x 10 <sup>11</sup> /ml | 5.12 x 10 <sup>10</sup> /ml |
| <i>Gated EVs (&gt;100 nm)</i>               | 7.7%                        | 16.19 %                     |
| <i>Gated EVs (&gt;100 nm) concentration</i> | 1.45 x 10 <sup>10</sup> /ml | 0.83 x 10 <sup>10</sup> /ml |

786

787

788 **S3 Fig. Guide RNA-encoding region synthesised for cloning into RGR plasmid and**  
789 **ssODN sequences for homology directed repair**

790

791 **Exon 3 guide 91**

792 **ggtacc**GAATTCGCGGCC**CACCAC****CTGATGAGTCCGTGAGGACGAAACGAGTAAGCTCG**  
793 **TCGTGGTGTTCACCATTGAACGGG**GTTTTAGAGCTATGCTGGAAACAGCATAGCAAGT  
794 TAAAATAAGGCTAGTCCGTTATCAACTTGAAAAAGTGGCACCGAGTCGGTGCTTTTTTTT  
795 **TGGCCGGCATGGTCCCAGCCTCCTCGCTGGCGCCGGCTGGGCAACATGCTTCGGCAT**  
796 **GGCGAATGGGACggcc**GCTCTAGAgctagc

797

798 **Exon 3 guide 46**

799 **ggtacc**GAATTCGCGGCC**CTCGTG****CTGATGAGTCCGTGAGGACGAAACGAGTAAGCTCG**  
800 **TCACGAGGACAAGTCTTCAAGCGG**GTTTTAGAGCTATGCTGGAAACAGCATAGCAAG  
801 TTAAAATAAGGCTAGTCCGTTATCAACTTGAAAAAGTGGCACCGAGTCGGTGCTTTTTTTT  
802 **TTGGCCGGCATGGTCCCAGCCTCCTCGCTGGCGCCGGCTGGGCAACATGCTTCGGCA**  
803 **TGGCGAATGGGACggcc**GCTCTAGAgctagc

804

805

806 **ssODN\_e3\_91:** (5'-  
807 CTTCAAGCGGTGCGAGGCCACAGCAAGGGTGTGCTGGTGTTCACCATTGATAAGTGACT  
808 AGGTAACTGAGTAGCACGGGGATTCTGGCTGGTACACAGTGTGCCAAGATTCCCTGAC  
809 CC-3')

810 **ssODN\_e3\_46-91:** (5'-  
811 AAAATTGCCTACAACGACGACCATCCACATGGACACGAGGATAAGTCTTCTAAGTGACT  
812 AGGTAACTGAGTAGCACGGGGATTCTGGCTGGTACACAGTGTGCCAAGATTCCCTGAC  
813 CC-3')

814

815 **Key:** Red: guide RNA target sequence; Yellow: reverse complement of first 6 nucleotides of  
816 target; Blue: Hammerhead ribozyme; Green: Hepatitis Delta virus ribozyme; Lower case:  
817 restriction endonuclease sites

818

819

820
